# Supplementary material
Source: PubMed Central journal article supplement (PMC6034637)
Supplement: NIHMS971787-supplement-supplement_1.pdf [file NIHMS971787-supplement-supplement_1.pdf]

## SUPPLEMENTAL TABLES

Table S1. Salt concentrations (mg/L) added to deionized waters for generation of dilution waters used in acute toxicity testing with *Neocloeon triangulifer*. 0.05 mg NaBr/L was added to each water as well. The “Recon” waters required bubbling of CO<sub>2</sub> to dissolve CaCO<sub>3</sub>, and then bubbling of air to drive off acidity.

| Water name              | KCl  | KHCO <sub>3</sub> | NaHCO <sub>3</sub> | MgSO <sub>4</sub><br>(an) | MgCl <sub>2</sub><br>*6H <sub>2</sub> O | CaSO <sub>4</sub> | CaCl <sub>2</sub> | NaCl  |
|-------------------------|------|-------------------|--------------------|---------------------------|-----------------------------------------|-------------------|-------------------|-------|
| Duluth 100 <sup>a</sup> | 0    | 9.9               | 125.1              | 38.0                      | 0                                       | 40.2              | 43.2              | 0     |
| High Ca:Mg              | 0    | 9.9               | 125.1              | 21.0                      | 15.0                                    | 60.0              | 35.0              | 0     |
| Low Ca:Mg               | 0    | 9.9               | 125.1              | 73.5                      | 31.3                                    | 0                 | 25.8              | 0     |
| High K                  | 21.3 | 9.9               | 125.1              | 38.0                      | 0                                       | 40.2              | 43.2              | 0     |
| High Na                 | 0    | 9.9               | 125.1              | 38.0                      | 0                                       | 40.2              | 43.2              | 295.0 |

  

| Water name | KCl | NaHCO <sub>3</sub> | MgSO <sub>4</sub><br>*7H <sub>2</sub> O | MgCl <sub>2</sub><br>*6H <sub>2</sub> O | CaCO <sub>3</sub> | NaCl | Na <sub>2</sub> SO <sub>4</sub> |
|------------|-----|--------------------|-----------------------------------------|-----------------------------------------|-------------------|------|---------------------------------|
| Recon 30   | 2.5 | 6.2                | 23.3                                    | 0                                       | 20.5              | 7.8  | 1.7                             |
| Recon 90   | 3.6 | 18.0               | 60.0                                    | 8.3                                     | 61.6              | 10.2 | 0                               |
| Recon 150  | 5.0 | 25.9               | 107.7                                   | 7.4                                     | 102.6             | 20.7 | 0                               |
| Recon 210  | 6.6 | 24.3               | 163.4                                   | 0                                       | 143.6             | 40.6 | 10.8                            |

<sup>a</sup>Duluth 100 water was also used as “Low K” and “Low Na”.

Table S2. Nominal major ion concentrations (mg/L) for various dilution waters used in acute toxicity testing with *Neocloeon triangulifer*. Each water also had 0.04 mg Br/L.

| Water name              | K    | Na    | Ca   | Mg   | SO <sub>4</sub> | Cl    | HCO <sub>3</sub> |
|-------------------------|------|-------|------|------|-----------------|-------|------------------|
| Duluth 100 <sup>a</sup> | 3.9  | 34.3  | 27.4 | 7.7  | 58.6            | 27.6  | 96.9             |
| Recon 30                | 1.3  | 5.3   | 8.2  | 2.3  | 10.2            | 5.9   | 29.5             |
| Recon 90                | 1.9  | 9.0   | 24.7 | 6.9  | 23.4            | 10.8  | 88.1             |
| Recon 150               | 2.6  | 15.3  | 41.1 | 11.5 | 41.9            | 17.5  | 143.9            |
| Recon 210               | 3.4  | 26.1  | 57.5 | 16.1 | 70.9            | 27.7  | 192.7            |
| High Ca:Mg              | 3.9  | 34.3  | 30.3 | 6.0  | 59.1            | 27.6  | 96.9             |
| Low Ca:Mg               | 3.9  | 34.3  | 9.3  | 18.6 | 58.6            | 27.4  | 96.9             |
| High K                  | 15.0 | 34.3  | 27.4 | 7.7  | 58.6            | 37.7  | 96.9             |
| High Na                 | 3.9  | 150.3 | 27.4 | 7.7  | 58.6            | 206.5 | 96.9             |

<sup>a</sup>Duluth 100 water was also used as “Low K” and “Low Na”.

Table S3. Test conditions for acute toxicity tests with *Neocloeon triangulifer*

---

|                                      |                                 |
|--------------------------------------|---------------------------------|
| 1. Temperature (°C)                  | 25 ± 1                          |
| 2. Photoperiod (L:D)/light intensity | 16:8h/~100 lux                  |
| 3. Test chamber size                 | 30 ml                           |
| 4. Test solution volume              | 20 ml                           |
| 5. Age of organisms                  | <24 h                           |
| 6. Dilution water                    | various                         |
| 7. Substrate                         | none                            |
| 8. # organisms per chamber           | 5                               |
| 9. # chambers/treatment              | 4                               |
| 10. Food                             | scraping of live diatom biofilm |
| 11. Aeration                         | none                            |
| 12. Test type                        | static                          |
| 13. Renewal frequency                | none                            |
| 14. Test duration                    | 96 h                            |
| 15. Control survival                 | ≥ 90%                           |
| 16. Endpoint                         | survival                        |

---

Table S4. Major ion concentrations<sup>1,2</sup> (mM) at 96-h median lethal concentration levels for the mayfly *Neocloeon triangulifer*.

| Hardness comparisons            |                |        |        |       |        |                 |        |                  |     |
|---------------------------------|----------------|--------|--------|-------|--------|-----------------|--------|------------------|-----|
| Salt tested                     | Dilution water | K      | Na     | Ca    | Mg     | SO <sub>4</sub> | Cl     | HCO <sub>3</sub> | pH  |
| NaCl                            | Recon 30       | 0.033  | 13.886 | 0.205 | 0.095  | 0.106           | 13.821 | 0.484            | 7.7 |
| NaCl                            | Recon 90       | 0.048  | 23.693 | 0.615 | 0.284  | 0.243           | 23.609 | 1.444            | 7.8 |
| NaCl                            | Recon 150      | 0.067  | 31.986 | 1.025 | 0.473  | 0.437           | 31.817 | 2.358            | 8.3 |
| NaCl                            | Recon 210      | 0.088  | 31.831 | 1.435 | 0.663  | 0.739           | 31.478 | 3.159            | 8.3 |
| Na <sub>2</sub> SO <sub>4</sub> | Recon 30       | 0.033  | 15.185 | 0.205 | 0.095  | 7.583           | 0.166  | 0.484            | 7.7 |
| Na <sub>2</sub> SO <sub>4</sub> | Recon 90       | 0.048  | 27.778 | 0.615 | 0.284  | 13.938          | 0.305  | 1.444            | 7.8 |
| Na <sub>2</sub> SO <sub>4</sub> | Recon 150      | 0.067  | 36.415 | 1.025 | 0.473  | 18.313          | 0.495  | 2.358            | 8.3 |
| Na <sub>2</sub> SO <sub>4</sub> | Recon 210      | 0.088  | 37.616 | 1.435 | 0.663  | 18.979          | 0.782  | 3.159            | 8.4 |
| K <sub>2</sub> SO <sub>4</sub>  | Recon 30       | 21.008 | 0.231  | 0.205 | 0.095  | 10.594          | 0.166  | 0.484            | 7.7 |
| K <sub>2</sub> SO <sub>4</sub>  | Recon 90       | 21.853 | 0.389  | 0.615 | 0.284  | 11.146          | 0.305  | 1.444            | 7.8 |
| K <sub>2</sub> SO <sub>4</sub>  | Recon 150      | 20.526 | 0.664  | 1.025 | 0.473  | 10.667          | 0.495  | 2.358            | 8.3 |
| K <sub>2</sub> SO <sub>4</sub>  | Recon 210      | 36.277 | 1.135  | 1.435 | 0.663  | 18.833          | 0.782  | 3.159            | 8.4 |
| K <sub>2</sub> SO <sub>4</sub>  | Recon 210      | 24.882 | 1.135  | 1.435 | 0.663  | 13.135          | 0.782  | 3.159            | 8.2 |
| MgSO <sub>4</sub>               | Recon 30       | 0.033  | 0.231  | 0.205 | 14.030 | 14.042          | 0.166  | 0.484            | 7.8 |
| MgSO <sub>4</sub>               | Recon 90       | 0.048  | 0.389  | 0.615 | 16.926 | 16.885          | 0.305  | 1.444            | 7.8 |
| MgSO <sub>4</sub>               | Recon 150      | 0.067  | 0.664  | 1.025 | 22.037 | 22.000          | 0.495  | 2.358            | 8.3 |
| MgSO <sub>4</sub>               | Recon 210      | 0.088  | 1.135  | 1.435 | 19.049 | 19.125          | 0.782  | 3.159            | 8.2 |
| Ca:Mg comparisons               |                |        |        |       |        |                 |        |                  |     |
| Salt tested                     | Dilution water | K      | Na     | Ca    | Mg     | SO <sub>4</sub> | Cl     | HCO <sub>3</sub> | pH  |
| NaCl                            | low Ca:Mg      | 0.099  | 26.245 | 0.232 | 0.764  | 0.611           | 25.527 | 1.589            | 8.3 |
| NaCl                            | high Ca:Mg     | 0.099  | 31.344 | 0.756 | 0.248  | 0.615           | 30.632 | 1.589            | 8.2 |
| Na <sub>2</sub> SO <sub>4</sub> | low Ca:Mg      | 0.099  | 25.873 | 0.232 | 0.764  | 12.802          | 0.771  | 1.589            | 8.3 |
| Na <sub>2</sub> SO <sub>4</sub> | high Ca:Mg     | 0.099  | 29.989 | 0.756 | 0.248  | 14.865          | 0.778  | 1.589            | 8.3 |
| K <sub>2</sub> SO <sub>4</sub>  | low Ca:Mg      | 20.066 | 1.490  | 0.232 | 0.764  | 10.594          | 0.771  | 1.589            | 8.3 |
| K <sub>2</sub> SO <sub>4</sub>  | high Ca:Mg     | 23.119 | 1.490  | 0.756 | 0.248  | 12.125          | 0.778  | 1.589            | 8.3 |
| MgSO <sub>4</sub>               | low Ca:Mg      | 0.099  | 1.490  | 0.232 | 9.237  | 9.083           | 0.771  | 1.589            | 8.2 |
| MgSO <sub>4</sub>               | high Ca:Mg     | 0.099  | 1.490  | 0.756 | 14.591 | 14.958          | 0.778  | 1.589            | 8.2 |
| Na/K interactions               |                |        |        |       |        |                 |        |                  |     |
| Salt tested                     | Dilution water | K      | Na     | Ca    | Mg     | SO <sub>4</sub> | Cl     | HCO <sub>3</sub> | pH  |
| KCl                             | low Na         | 33.903 | 1.490  | 0.684 | 0.316  | 0.611           | 34.581 | 1.589            | 8.4 |
| KCl                             | high Na        | 28.714 | 6.538  | 0.684 | 0.316  | 0.611           | 34.440 | 1.589            | 8.3 |
| NaCl                            | low K          | 0.099  | 26.380 | 0.684 | 0.316  | 0.611           | 25.668 | 1.589            | 8.3 |
| NaCl                            | low K          | 0.099  | 33.234 | 0.684 | 0.316  | 0.611           | 32.522 | 1.589            | 8.3 |
| NaCl                            | high K         | 0.384  | 28.972 | 0.684 | 0.316  | 0.611           | 28.545 | 1.589            | 8.3 |

<sup>1</sup> Concentrations are based on LC50s calculated from measured anion concentrations for each salt tested, and nominal concentrations in dilution water.

<sup>2</sup> In addition to the other ions, all solutions had 0.00051 mM Br<sup>-</sup>.

Table S5. Major ion activities<sup>1,2</sup> (mM) at 96-h median lethal levels for the mayfly *Neocloeon triangulifer*.

| Hardness comparisons            |                |        |        |       |       |                 |        |                  |
|---------------------------------|----------------|--------|--------|-------|-------|-----------------|--------|------------------|
| Salt tested                     | Dilution water | K      | Na     | Ca    | Mg    | SO <sub>4</sub> | Cl     | HCO <sub>3</sub> |
| NaCl                            | Recon 30       | 0.029  | 12.214 | 0.121 | 0.056 | 0.061           | 12.156 | 0.421            |
| NaCl                            | Recon 90       | 0.041  | 20.098 | 0.313 | 0.143 | 0.117           | 20.022 | 1.205            |
| NaCl                            | Recon 150      | 0.055  | 26.495 | 0.468 | 0.214 | 0.187           | 26.354 | 1.859            |
| NaCl                            | Recon 210      | 0.073  | 26.265 | 0.634 | 0.292 | 0.306           | 25.979 | 2.438            |
| Na <sub>2</sub> SO <sub>4</sub> | Recon 30       | 0.028  | 12.838 | 0.076 | 0.038 | 3.995           | 0.143  | 0.411            |
| Na <sub>2</sub> SO <sub>4</sub> | Recon 90       | 0.039  | 22.347 | 0.176 | 0.089 | 6.081           | 0.251  | 1.173            |
| Na <sub>2</sub> SO <sub>4</sub> | Recon 150      | 0.052  | 28.560 | 0.260 | 0.132 | 7.250           | 0.399  | 1.818            |
| Na <sub>2</sub> SO <sub>4</sub> | Recon 210      | 0.068  | 29.377 | 0.357 | 0.181 | 7.319           | 0.628  | 2.358            |
| K <sub>2</sub> SO <sub>4</sub>  | Recon 30       | 17.200 | 0.190  | 0.066 | 0.033 | 5.046           | 0.140  | 0.406            |
| K <sub>2</sub> SO <sub>4</sub>  | Recon 90       | 17.797 | 0.319  | 0.195 | 0.098 | 5.101           | 0.255  | 1.202            |
| K <sub>2</sub> SO <sub>4</sub>  | Recon 150      | 16.760 | 0.545  | 0.329 | 0.165 | 4.816           | 0.414  | 1.914            |
| K <sub>2</sub> SO <sub>4</sub>  | Recon 210      | 28.127 | 0.888  | 0.363 | 0.184 | 7.149           | 0.629  | 2.464            |
| K <sub>2</sub> SO <sub>4</sub>  | Recon 210      | 19.943 | 0.916  | 0.422 | 0.212 | 5.503           | 0.645  | 2.517            |
| MgSO <sub>4</sub>               | Recon 30       | 0.027  | 0.187  | 0.065 | 4.775 | 4.758           | 0.136  | 0.371            |
| MgSO <sub>4</sub>               | Recon 90       | 0.038  | 0.311  | 0.181 | 5.371 | 5.290           | 0.246  | 1.093            |
| MgSO <sub>4</sub>               | Recon 150      | 0.052  | 0.519  | 0.271 | 6.318 | 6.223           | 0.390  | 1.627            |
| MgSO <sub>4</sub>               | Recon 210      | 0.069  | 0.895  | 0.398 | 5.719 | 5.631           | 0.622  | 2.213            |
| Ca:Mg comparisons               |                |        |        |       |       |                 |        |                  |
| Salt tested                     | Dilution water | K      | Na     | Ca    | Mg    | SO <sub>4</sub> | Cl     | HCO <sub>3</sub> |
| NaCl                            | low Ca:Mg      | 0.084  | 22.074 | 0.112 | 0.366 | 0.285           | 21.475 | 1.284            |
| NaCl                            | high Ca:Mg     | 0.083  | 26.057 | 0.350 | 0.114 | 0.272           | 25.481 | 1.264            |
| Na <sub>2</sub> SO <sub>4</sub> | low Ca:Mg      | 0.080  | 20.939 | 0.069 | 0.246 | 5.685           | 0.638  | 1.265            |
| Na <sub>2</sub> SO <sub>4</sub> | high Ca:Mg     | 0.079  | 23.968 | 0.210 | 0.075 | 6.323           | 0.637  | 1.249            |
| K <sub>2</sub> SO <sub>4</sub>  | low Ca:Mg      | 16.390 | 1.225  | 0.075 | 0.266 | 4.884           | 0.646  | 1.298            |
| K <sub>2</sub> SO <sub>4</sub>  | high Ca:Mg     | 18.675 | 1.213  | 0.231 | 0.082 | 5.381           | 0.647  | 1.285            |
| MgSO <sub>4</sub>               | low Ca:Mg      | 0.082  | 1.242  | 0.085 | 3.592 | 3.510           | 0.646  | 1.221            |
| MgSO <sub>4</sub>               | high Ca:Mg     | 0.079  | 1.200  | 0.231 | 4.806 | 4.897           | 0.632  | 1.155            |
| Na/K interactions               |                |        |        |       |       |                 |        |                  |
| Salt tested                     | Dilution water | K      | Na     | Ca    | Mg    | SO <sub>4</sub> | Cl     | HCO <sub>3</sub> |
| KCl                             | low Na         | 27.966 | 1.229  | 0.307 | 0.140 | 0.256           | 28.531 | 1.276            |
| KCl                             | high Na        | 23.692 | 5.393  | 0.308 | 0.140 | 0.257           | 28.423 | 1.273            |
| NaCl                            | low K          | 0.083  | 22.179 | 0.329 | 0.151 | 0.283           | 21.593 | 1.268            |
| NaCl                            | low K          | 0.082  | 27.519 | 0.311 | 0.142 | 0.266           | 26.945 | 1.246            |
| NaCl                            | high K         | 0.321  | 24.197 | 0.322 | 0.147 | 0.275           | 23.853 | 1.271            |

<sup>1</sup> Activities modelled with Visual MINTEQ using mM concentrations listed in Table S4.

<sup>2</sup> In addition to the other ions, all solutions had ~0.0004 mM Br<sup>-</sup>.
